# Supplementary material for: How Low Nucleation Density of Graphene on CuNi Alloy is Achieved
Source: PubMed Central journal article supplement (PMC6010776; doi:10.1002/advs.201700961), 2018-03-12
Supplement: ADVS-5-1700961-s001.pdf [file ADVS-5-1700961-s001.pdf]

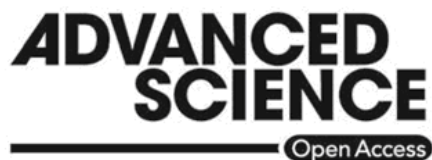

## Supporting Information

for *Adv. Sci.*, DOI: 10.1002/advs.201700961

How Low Nucleation Density of Graphene on CuNi Alloy is Achieved

*Yifan Liu, Tianru Wu, Yuling Yin, Xuefu Zhang, Qingkai Yu, Debra J. Searles, Feng Ding, Qinghong Yuan,\* and Xiaoming Xie\**

## Supporting Information

### How low nucleation density of graphene on CuNi alloy is achieved

Yifan Liu, Tianru Wu, Yuling Yin, Xuefu Zhang, Qingkai Yu, Debra J. Searles, Feng Ding, Qinghong Yuan,\* Xiaoming Xie\*

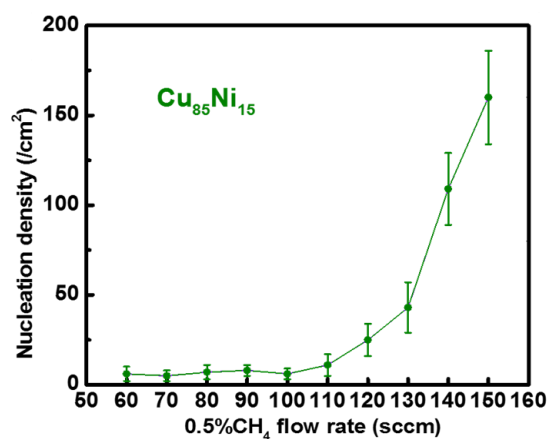

**Supplementary Figure 1** Graphene nucleation density as a function of carbon precursor flow rate on Cu<sub>85</sub>Ni<sub>15</sub> under the growth temperature of 1050 °C.

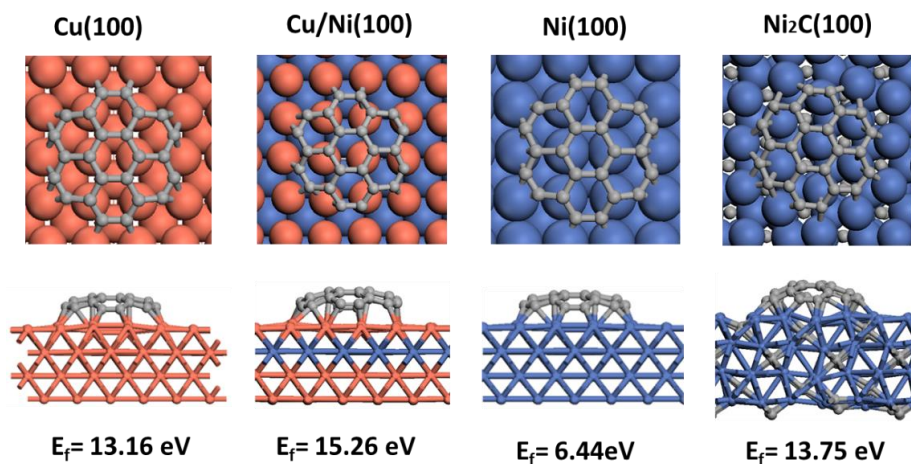

**Supplementary Figure 2** The formation energies of C<sub>24</sub> on Cu(100), Cu/Ni(100), Ni(100) and Ni<sub>2</sub>C(100) surfaces.

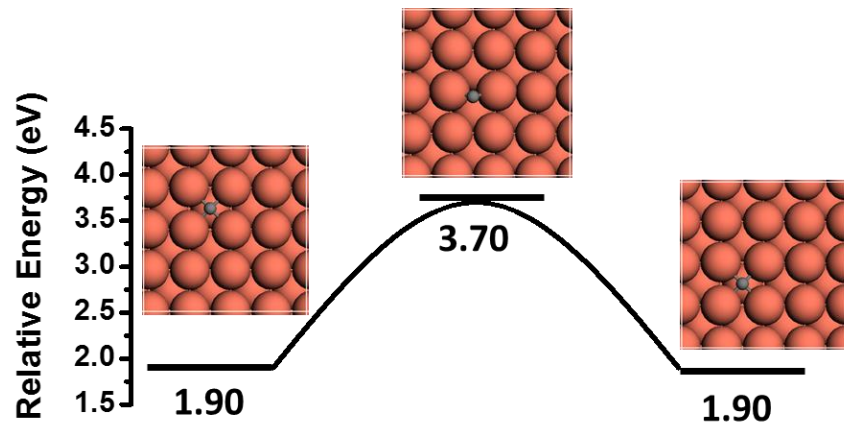

**Supplementary Figure 3** The energy curve of C diffusion on Cu(100) surface.

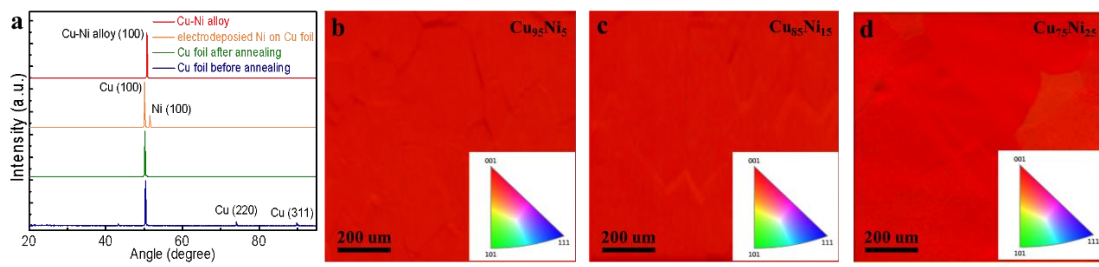

**Supplementary Figure 4 a)** XRD spectra of Cu and Cu-Ni bilayer before and after the annealing process. **b-d)** EBSD image of  $\text{Cu}_{95}\text{Ni}_5$ ,  $\text{Cu}_{85}\text{Ni}_{15}$  and  $\text{Cu}_{75}\text{Ni}_{25}$  grains after high temperature annealing
